# Supplementary material
Source: Research Square preprint supplement (doi:10.21203/rs.3.rs-9210188/v1)
Supplement: Supplementary file 1 [file 6acb13ff10492176ca3a32d8.docx]

Supplementary file 1

**Association between ambient temperature and first-time hospitalizations for acute kidney injury in Taiwan: A nationwide case-crossover study**


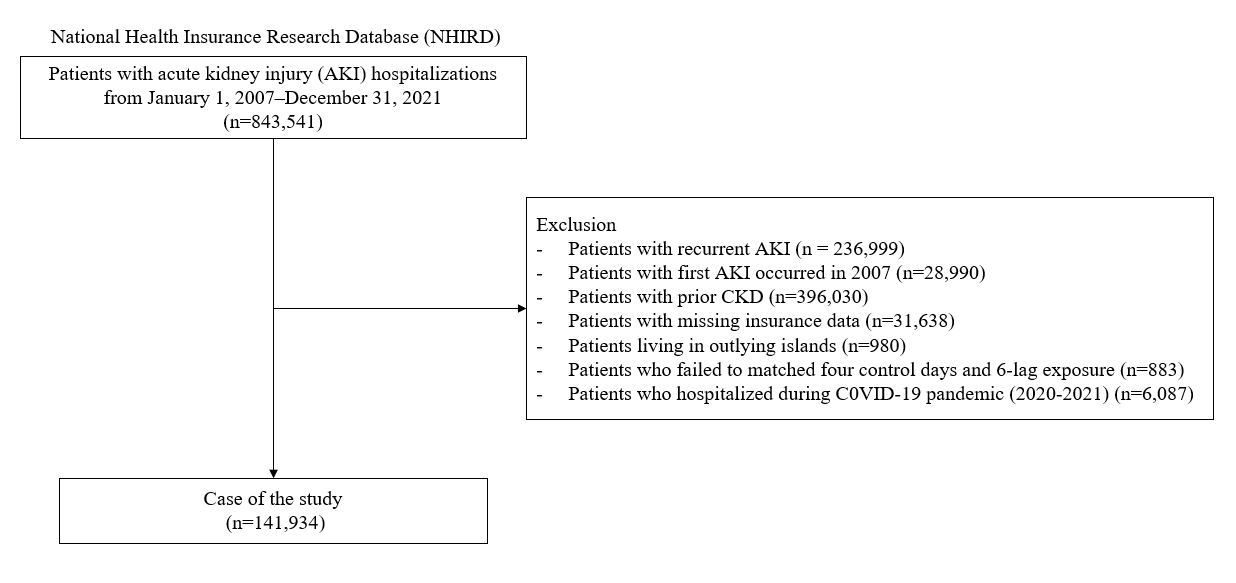


**Figure S1.** Study population selection process

**Table S1.** Demographic characteristics of hospitalized patients with acute kidney injury (AKI) in Taiwan (2008–2019)

|  | Cases hospitalized for acute kidney injury  (n =141,934) | |
| --- | --- | --- |
|  | *n* | *%* |
| Age (year) |  |  |
| 0-44 | 9,331 | 6.57 |
| 45-64 | 36,574 | 25.77 |
| ≥ 65 | 96,029 | 67.66 |
| Gender |  |  |
| Male | 79,862 | 56.27 |
| Female | 62,072 | 43.73 |
| Hypertension |  |  |
| Yes | 102,655 | 72.33 |
| No | 39,279 | 27.67 |
| Diabetes |  |  |
| Yes | 72,408 | 51.02 |
| No | 69,526 | 48.98 |
| Farmer |  |  |
| Yes | 33,932 | 23.91 |
| No | 108,002 | 76.09 |
| Fisherman |  |  |
| Yes | 2,342 | 1.65 |
| No | 139,592 | 98.35 |
| Low income |  |  |
| Yes | 1,976 | 1.39 |
| No | 139,958 | 98.61 |
| Study areas |  |  |
| Yilan County | 4,577 | 3.22 |
| Hualien County | 3,832 | 2.70 |
| Nantou County | 3,431 | 2.42 |
| Pingtung County | 4,433 | 3.12 |
| Miaoli County | 2,268 | 1.60 |
| Taoyuan City | 14,844 | 10.46 |
| Kaohsiung City | 13,514 | 9.52 |
| Keelung City | 3,423 | 2.41 |
| Yunlin County | 4,872 | 3.43 |
| New Taipei City | 12,053 | 8.49 |
| Hsinchu City | 3,480 | 2.45 |
| Hsinchu County | 1,430 | 1.01 |
| Chiayi City | 4,231 | 2.98 |
| Chiayi County | 4,646 | 3.27 |
| Changhua County | 8,233 | 5.80 |
| Taichung City | 14,437 | 10.17 |
| Taipei City | 24,825 | 17.49 |
| Taitung County | 1,606 | 1.13 |
| Tainan City | 11,799 | 8.31 |
| Years |  |  |
| 2008 | 7,499 | 5.07% |
| 2009 | 8,654 | 5.85% |
| 2010 | 10,849 | 7.33% |
| 2011 | 11,396 | 7.7% |
| 2012 | 12,105 | 8.18% |
| 2013 | 12,470 | 8.42% |
| 2014 | 13,516 | 9.13% |
| 2015 | 15,169 | 10.25% |
| 2016 | 15,893 | 10.74% |
| 2017 | 14,677 | 9.92% |
| 2018 | 10,448 | 7.06% |
| 2019 | 9,258 | 6.25% |
| Months |  |  |
| January | 11,997 | 8.45% |
| February | 11,725 | 8.26% |
| March | 12,177 | 8.58% |
| April | 11,763 | 8.29% |
| May | 12,239 | 8.62% |
| June | 12,287 | 8.66% |
| July | 12,275 | 8.65% |
| August | 12,047 | 8.49% |
| September | 11,285 | 7.95% |
| October | 11,332 | 7.98% |
| November | 11,000 | 7.75% |
| December | 11,807 | 8.32% |
| Day of week |  |  |
| Sunday | 14,672 | 10.34% |
| Monday | 22,816 | 16.08% |
| Tuesday | 21,421 | 15.09% |
| Wednesday | 21,151 | 14.90% |
| Thursday | 21,341 | 15.04% |
| Friday | 21,817 | 15.37% |
| Saturday | 18,716 | 13.19% |


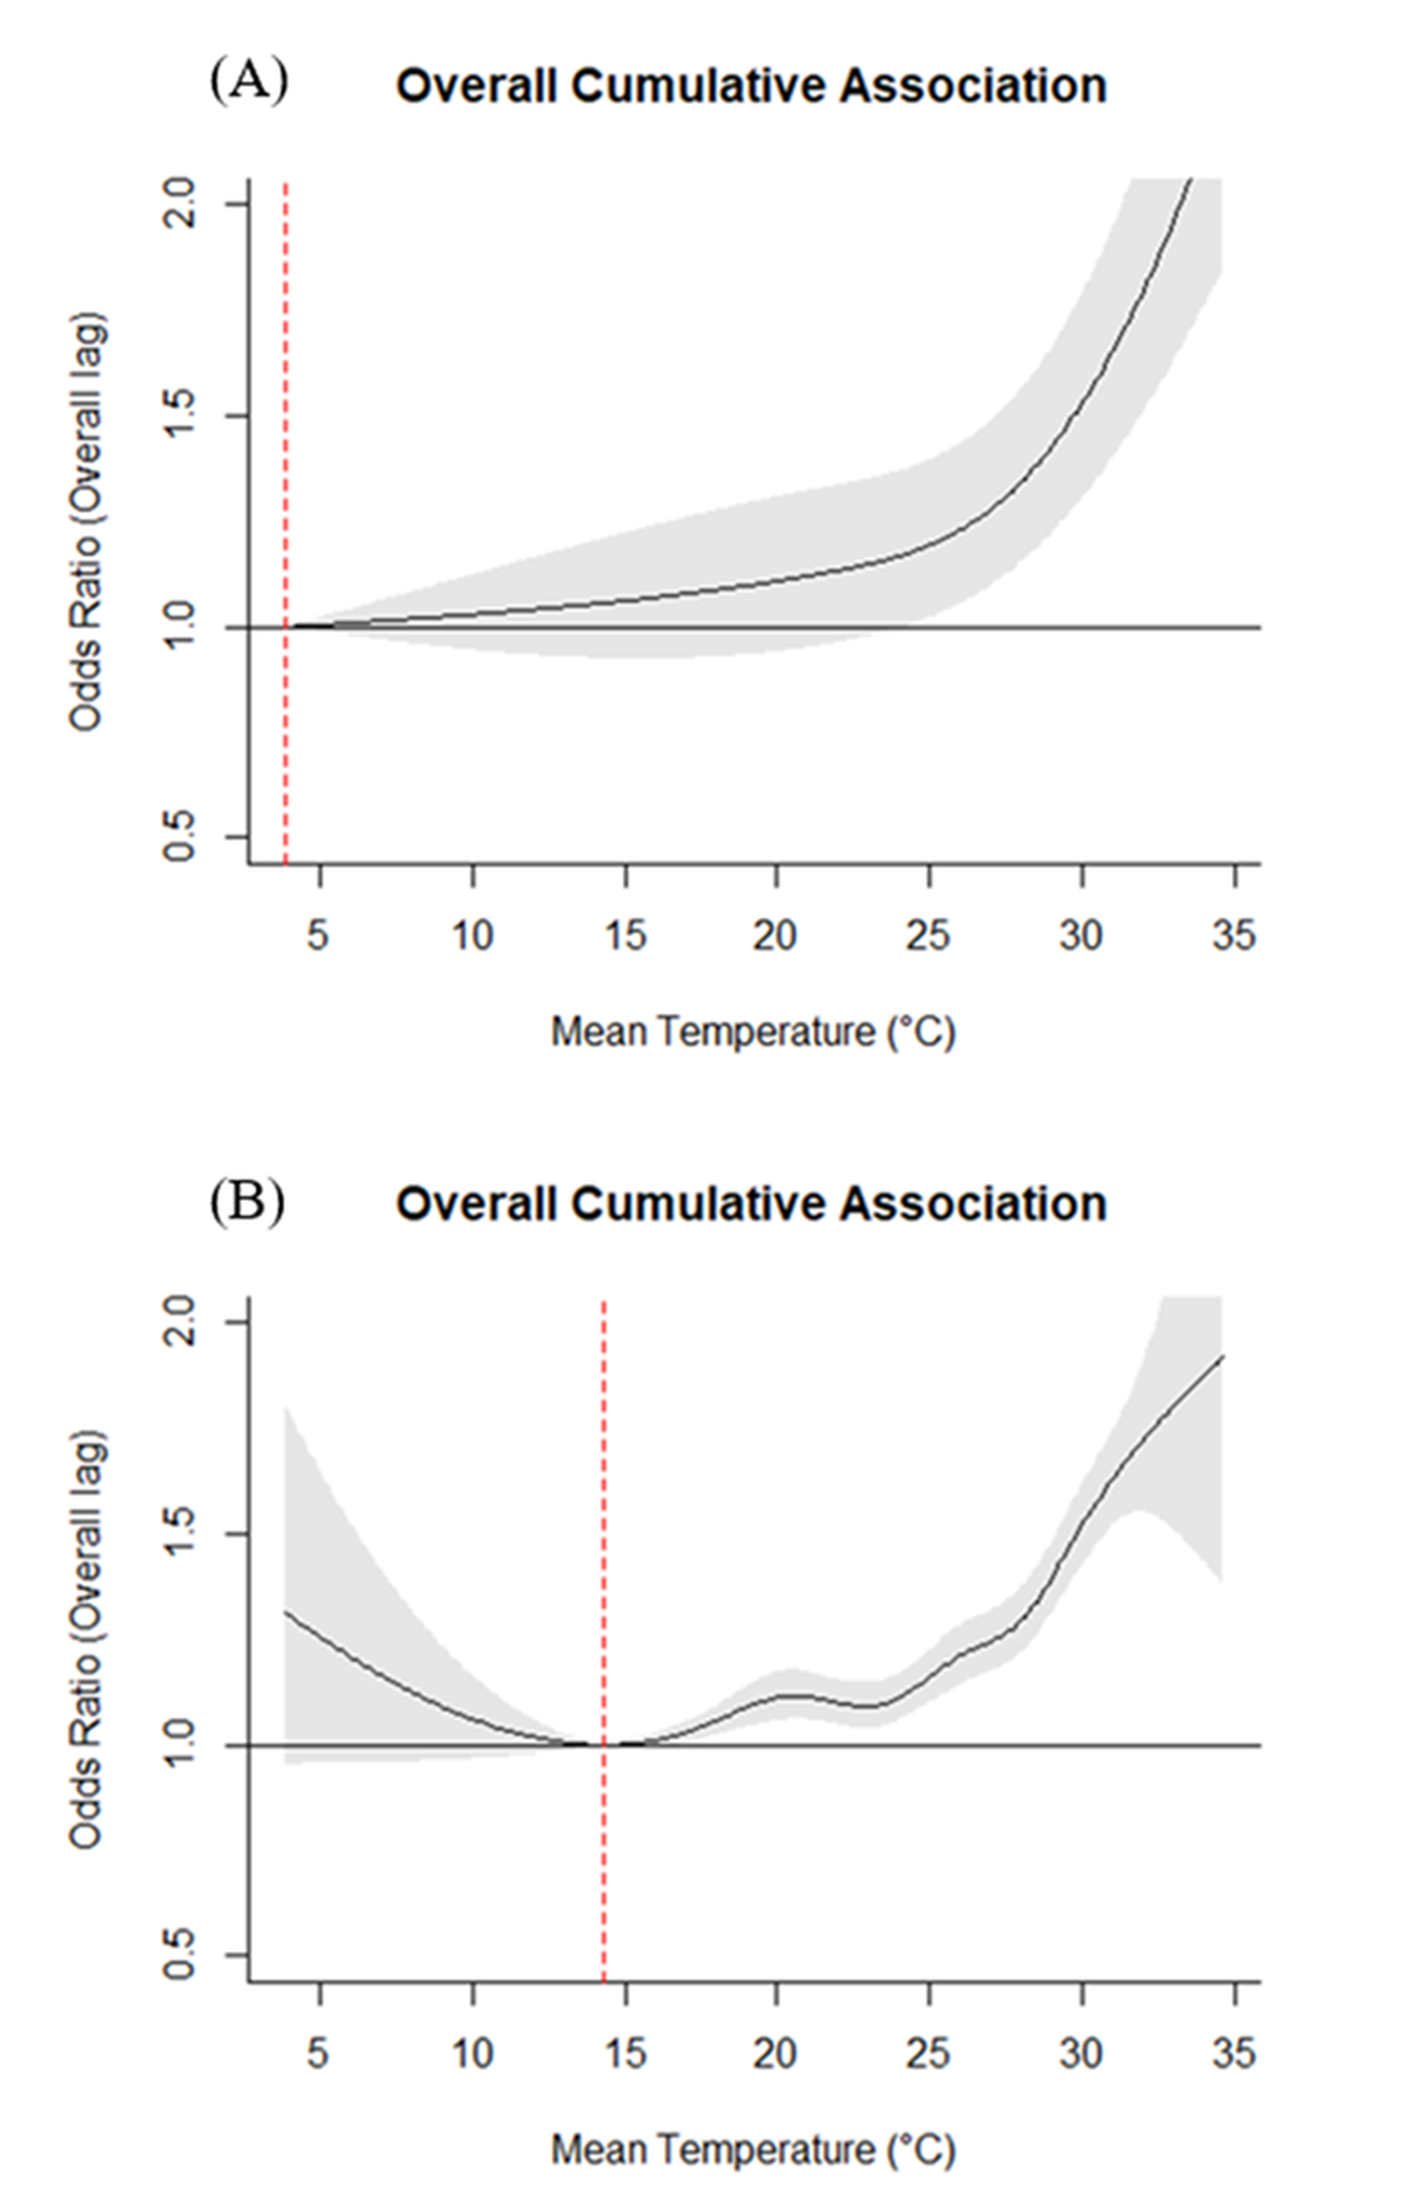


**Figure S2.** Sensitivity analysis of the overall cumulative temperature–AKI association using alternative degrees of freedom (df) for the temperature–response spline. (A) Model using 3 degrees of freedom, showing a slightly smoother temperature–response curve. (B) Model using 7 degrees of freedom, yielding a more flexible curve to capture potential nonlinearities. These analyses assess the robustness of the main specification (df = 5) to different spline smoothness choices in the cross-basis function.

**Table S2.** Overall cumulative main effect estimates for AKI hospitalized by mean temperature and maximum temperature (2008-2019)

|  | Mean temperature | | | | Maximum temperature | | |
| --- | --- | --- | --- | --- | --- | --- | --- |
|  | *OR* a | *Lower CI* | *Upper CI* | *OR a* | | *Lower CI* | *Upper CI* |
| 4°C | 1.010 | 0.867 | 1.176 | – | | – | – |
| 5°C | 1.007 | 0.889 | 1.141 | – | | – | – |
| 6°C | 1.005 | 0.911 | 1.109 | 1.078 | | 0.887 | 1.309 |
| 7°C | 1.003 | 0.933 | 1.078 | 1.065 | | 0.898 | 1.264 |
| 8°C | 1.000 | 0.956 | 1.049 | 1.054 | | 0.908 | 1.222 |
| 9°C | 1.000 | 0.978 | 1.023 | 1.043 | | 0.919 | 1.183 |
| 10°C | 1.000 | (reference) | – | 1.033 | | 0.931 | 1.147 |
| 11°C | 1.000 | 0.980 | 1.022 | 1.024 | | 0.942 | 1.114 |
| 12°C | 1.002 | 0.962 | 1.043 | 1.016 | | 0.953 | 1.184 |
| 13°C | 1.004 | 0.950 | 1.063 | 1.010 | | 0.964 | 1.058 |
| 14°C | 1.008 | 0.940 | 1.082 | 1.005 | | 0.975 | 1.035 |
| 15°C | 1.013 | 0.933 | 1.099 | 1.001 | | 0.986 | 1.017 |
| 16°C | 1.019 | 0.931 | 1.116 | 1.000 | | (reference) | – |
| 17°C | 1.027 | 0.933 | 1.130 | 1.000 | | 0.992 | 1.010 |
| 18°C | 1.037 | 0.940 | 1.144 | 1.003 | | 0.986 | 1.021 |
| 19°C | 1.049 | 0.952 | 1.156 | 1.009 | | 0.985 | 1.033 |
| 20°C | 1.063 | 0.967 | 1.168 | 1.017 | | 0.988 | 1.046 |
| 21°C | 1.077 | 0.984 | 1.180 | 1.027 | | 0.995 | 1.060 |
| 22°C | 1.092 | 0.999 | 1.194 | **1.041** | | **1.007** | **1.077** |
| 23°C | **1.107** | **1.013** | **1.208** | 1.058 | | 1.020 | 1.099 |
| 24°C | 1.121 | 1.024 | 1.227 | 1.078 | | 1.033 | 1.124 |
| 25°C | 1.140 | 1.037 | 1.254 | 1.096 | | 1.047 | 1.148 |
| 26°C | 1.172 | 1.061 | 1.294 | 1.112 | | 1.060 | 1.168 |
| 27°C | 1.222 | 1.106 | 1.351 | 1.124 | | 1.072 | 1.179 |
| 28°C | 1.294 | 1.172 | 1.428 | 1.136 | | 1.083 | 1.191 |
| 29°C | 1.383 | 1.153 | 1.527 | 1.154 | | 1.098 | 1.212 |
| 30°C | 1.488 | 1.347 | 1.644 | 1.186 | | 1.127 | 1.247 |
| 31°C | 1.607 | 1.446 | 1.786 | 1.238 | | 1.176 | 1.303 |
| 32°C | 1.741 | 1.537 | 1.971 | 1.308 | | 1.240 | 1.381 |
| 33°C | 1.892 | 1.615 | 2.215 | 1.392 | | 1.315 | 1.474 |
| 34°C | **2.058** | **1.681** | **2.520** | 1.486 | | 1.401 | 1.575 |
| 35°C | – | – | – | 1.589 | | 1.486 | 1.699 |
| 36°C | – | – | – | 1.704 | | 1.557 | 1.863 |
| 37°C | – | – | – | 1.829 | | 1.613 | 2.074 |
| 38°C | – | – | – | 1.965 | | 1.657 | 2.330 |
| 39°C | – | – | – | **2.113** | | **1.696** | **2.631** |

a Adjusted for PM2.5, O3, NO2, and relative humidity


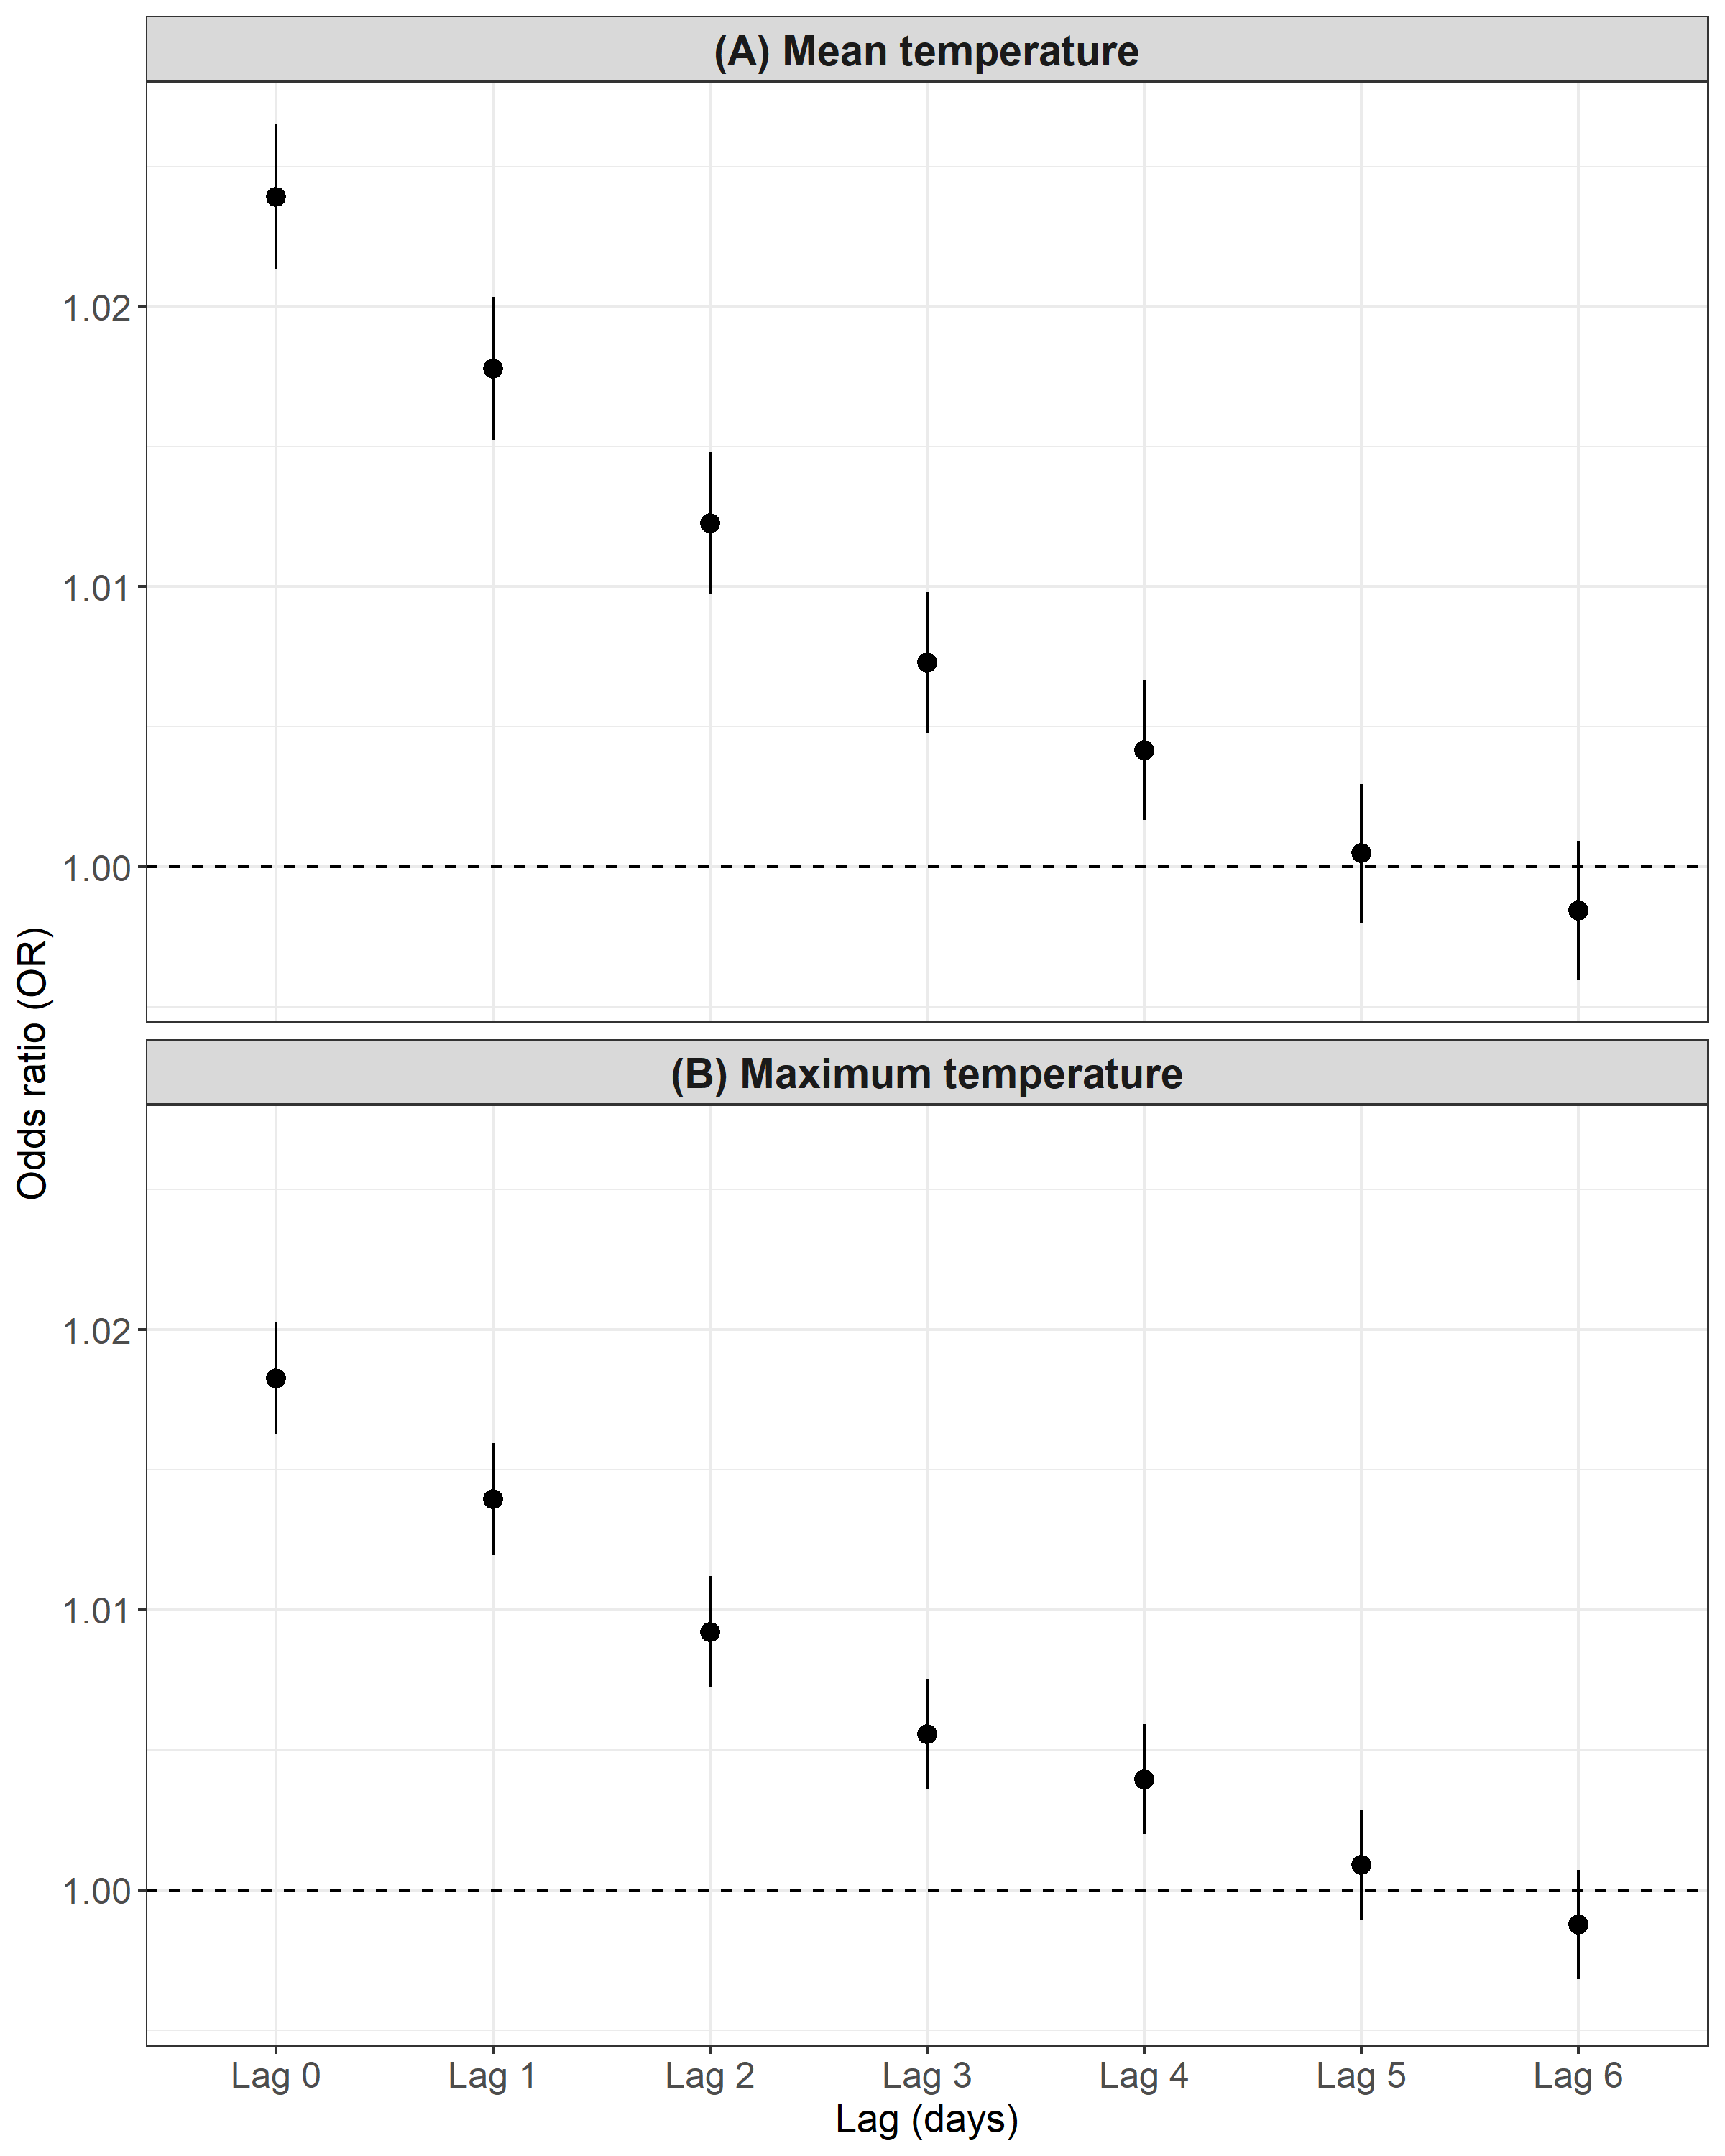


**Figure S3.** Lag-specific temperature associations with AKI hospitalization. Panels (A) and (B) show overall lag-specific odds ratios (ORs) for the association between mean and maximum temperature, respectively, and AKI hospitalization, estimated from the time-stratified case-crossover model with a distributed lag non-linear cross-basis. The largest OR was observed on the day of exposure (Lag 0), whereas later lag days contributed smaller ORs, indicating that the temperature effect on AKI hospitalization is predominantly acute rather than delayed.

**Table S3.** Odds ratios (ORs) for AKI hospitalization at the 90th, 95th, and 99th percentiles of mean temperature compared with the minimum morbidity temperature (MMT), stratified by age, sex, comorbidity, occupation, and socioeconomic status (2008–2019).

|  | Mean temperature | | | | | | | | |
| --- | --- | --- | --- | --- | --- | --- | --- | --- | --- |
|  | *T90* a | *Lower CI* | *Upper CI* | *T95* a | *Lower CI* | *Upper CI* | *T99* a | *Lower CI* | *Upper CI* |
| Overall | 1.383 | 1.153 | 1.527 | 1.488 | 1.347 | 1.644 | 1.892 | 1.615 | 2.215 |
| Age (year) |  |  |  |  |  |  |  |  |  |
| 0-44 | 1.455 | 0.985 | 2.151 | 1.418 | 0.985 | 2.101 | 1.066 | 0.567 | 2.004 |
| 45-64 | 1.284 | 1.051 | 1.569 | 1.358 | 1.110 | 1.569 | 1.751 | 1.270 | 2.416 |
| ≥ 65 | 1.421 | 1.261 | 1.602 | 1.554 | 1.378 | 1.752 | 2.085 | 1.725 | 2.521 |
| Sex |  |  |  |  |  |  |  |  |  |
| Male | 1.331 | 1.167 | 1.517 | 1.436 | 1.258 | 1.639 | 1.774 | 1.438 | 2.188 |
| Female | 1.459 | 1.255 | 1.697 | 1.563 | 1.342 | 1.819 | 2.058 | 1.618 | 2.617 |
| Hypertension |  |  |  |  |  |  |  |  |  |
| Yes | 1.388 | 1.235 | 1.560 | 1.494 | 1.328 | 1.680 | 1.891 | 1.571 | 2.277 |
| No | 1.378 | 1.142 | 1.663 | 1.480 | 1.226 | 1.788 | 1.901 | 1.405 | 2.572 |
| Diabetes |  |  |  |  |  |  |  |  |  |
| Yes | 1.300 | 1.132 | 1.492 | 1.394 | 1.213 | 1.602 | 1.666 | 1.336 | 2.077 |
| No | 1.479 | 1.283 | 1.705 | 1.594 | 1.382 | 1.840 | 2.175 | 1.734 | 2.728 |
| Farmer |  |  |  |  |  |  |  |  |  |
| Yes | 1.445 | 1.168 | 1.788 | 1.553 | 1.253 | 1.925 | 1.682 | 1.176 | 2.406 |
| No | 1.365 | 1.221 | 1.527 | 1.467 | 1.310 | 1.642 | 1.941 | 1.627 | 2.316 |
| Fisherman |  |  |  |  |  |  |  |  |  |
| Yes | 3.255 | 1.279 | 8.282 | 3.879 | 1.520 | 9.896 | 9.111 | 2.164 | 38.349 |
| No | 1.370 | 1.240 | 1.514 | 1.471 | 1.331 | 1.626 | 1.852 | 1.580 | 2.172 |
| Low income |  |  |  |  |  |  |  |  |  |
| Yes | 2.492 | 0.987 | 6.296 | 2.652 | 1.044 | 6.735 | 2.716 | 0.708 | 10.118 |
| No | 1.372 | 1.242 | 1.516 | 1.476 | 1.335 | 1.632 | 1.884 | 1.607 | 2.209 |

a Adjusted for PM2.5, O3, NO2, and relative humidity.

**Table S4.** Odds ratios (ORs) for AKI hospitalization at the 90th, 95th, and 99th percentiles of maximum temperature compared with the minimum morbidity temperature (MMT), stratified by age, sex, comorbidity, occupation, and socioeconomic status (2008–2019).

|  | Maximum temperature | | | | | | | | |
| --- | --- | --- | --- | --- | --- | --- | --- | --- | --- |
|  | *T90* a | *Lower CI* | *Upper CI* | *T95* a | *Lower CI* | *Upper CI* | *T99* a | *Lower CI* | *Upper CI* |
| Overall | 1.486 | 1.401 | 1.575 | 1.704 | 1.557 | 1.863 | 1.965 | 1.657 | 2.330 |
| Age (year) |  |  |  |  |  |  |  |  |  |
| 0-44 | 1.086 | 0.860 | 1.371 | 0.931 | 0.650 | 1.334 | 0.747 | 0.377 | 1.483 |
| 45-64 | 1.360 | 1.209 | 1.530 | 1.536 | 1.281 | 1.842 | 1.735 | 1.227 | 2.455 |
| ≥65 | 1.580 | 1.471 | 1.697 | 1.876 | 1.684 | 2.090 | 2.262 | 1.847 | 2.769 |
| Sex |  |  |  |  |  |  |  |  |  |
| Male | 1.518 | 1.403 | 1.642 | 1.730 | 1.535 | 1.950 | 1.965 | 1.566 | 2.465 |
| Female | 1.466 | 1.322 | 1.581 | 1.671 | 1.457 | 1.915 | 1.966 | 1.518 | 2.546 |
| Hypertension |  |  |  |  |  |  |  |  |  |
| Yes | 1.470 | 1.371 | 1.575 | 1.732 | 1.558 | 1.925 | 2.082 | 1.707 | 2.540 |
| No | 1.533 | 1.369 | 1.717 | 1.646 | 1.388 | 1.952 | 1.713 | 1.239 | 2.369 |
| Diabetes |  |  |  |  |  |  |  |  |  |
| Yes | 1.441 | 1.327 | 1.565 | 1.674 | 1.475 | 1.898 | 1.955 | 1.544 | 2.475 |
| No | 1.535 | 1.410 | 1.671 | 1.745 | 1.535 | 1.984 | 2.002 | 1.568 | 2.556 |
| Farmer |  |  |  |  |  |  |  |  |  |
| Yes | 1.554 | 1.372 | 1.761 | 1.679 | 1.375 | 2.049 | 1.749 | 1.193 | 2.565 |
| No | 1.463 | 1.368 | 1.564 | 1.705 | 1.542 | 1.886 | 2.024 | 1.677 | 2.444 |
| Fisherman |  |  |  |  |  |  |  |  |  |
| Yes | 2.399 | 1.437 | 4.005 | 4.574 | 2.047 | 10.220 | 11.290 | 2.388 | 53.376 |
| No | 1.470 | 1.373 | 1.569 | 1.715 | 1.537 | 1.893 | 1.912 | 1.624 | 2.213 |
| Low income |  |  |  |  |  |  |  |  |  |
| Yes | 1.647 | 0.976 | 2.780 | 1.464 | 0.686 | 3.123 | 1.141 | 0.282 | 4.618 |
| No | 1.483 | 1.398 | 1.574 | 1.708 | 1.560 | 1.870 | 1.982 | 1.669 | 2.354 |

a Adjusted for PM2.5, O3, NO2, and relative humidity.

**Table S5.** ORs for 1°C increments in mean and maximum temperature above the minimum morbidity temperature (MMT) on AKI hospitalizations, stratified by age, sex, comorbidity, occupation, and socioeconomic status (2008–2019).

|  | Mean temperature | | | | Maximum temperature | | |
| --- | --- | --- | --- | --- | --- | --- | --- |
|  | *OR* a | *Lower CI* | *Upper CI* | *OR a* | | *Lower CI* | *Upper CI* |
| Overall | 1.023 | 1.019 | 1.027 | 1.022 | | 1.018 | 1.025 |
| Age (year) |  |  |  |  | |  |  |
| 0-44 | 1.007 | 0.992 | 1.022 | 1.004 | | 0.991 | 1.017 |
| 45-64 | 1.015 | 1.007 | 1.023 | 1.016 | | 1.010 | 1.023 |
| ≥65 | 1.028 | 1.023 | 1.032 | 1.025 | | 1.021 | 1.029 |
| Sex |  |  |  |  | |  |  |
| Male | 1.024 | 1.019 | 1.029 | 1.023 | | 1.018 | 1.027 |
| Female | 1.022 | 1.016 | 1.028 | 1.021 | | 1.015 | 1.026 |
| Hypertension |  |  |  |  | |  |  |
| Yes | 1.022 | 1.018 | 1.027 | 1.021 | | 1.017 | 1.025 |
| No | 1.026 | 1.019 | 1.033 | 1.023 | | 1.017 | 1.030 |
| Diabetes |  |  |  |  | |  |  |
| Yes | 1.019 | 1.014 | 1.026 | 1.019 | | 1.014 | 1.024 |
| No | 1.027 | 1.022 | 1.033 | 1.025 | | 1.020 | 1.030 |
| Farmer |  |  |  |  | |  |  |
| Yes | 1.028 | 1.019 | 1.036 | 1.024 | | 1.017 | 1.031 |
| No | 1.022 | 1.017 | 1.026 | 1.021 | | 1.017 | 1.025 |
| Fisherman |  |  |  |  | |  |  |
| Yes | 1.050 | 1.017 | 1.084 | 1.045 | | 1.016 | 1.075 |
| No | 1.023 | 1.019 | 1.027 | 1.021 | | 1.018 | 1.025 |
| Low income |  |  |  |  | |  |  |
| Yes | 1.030 | 0.997 | 1.065 | 1.024 | | 0.995 | 1.054 |
| No | 1.023 | 1.019 | 1.027 | 1.022 | | 1.018 | 1.025 |

a Adjusted for PM2.5, O3, NO2, and relative humidity.


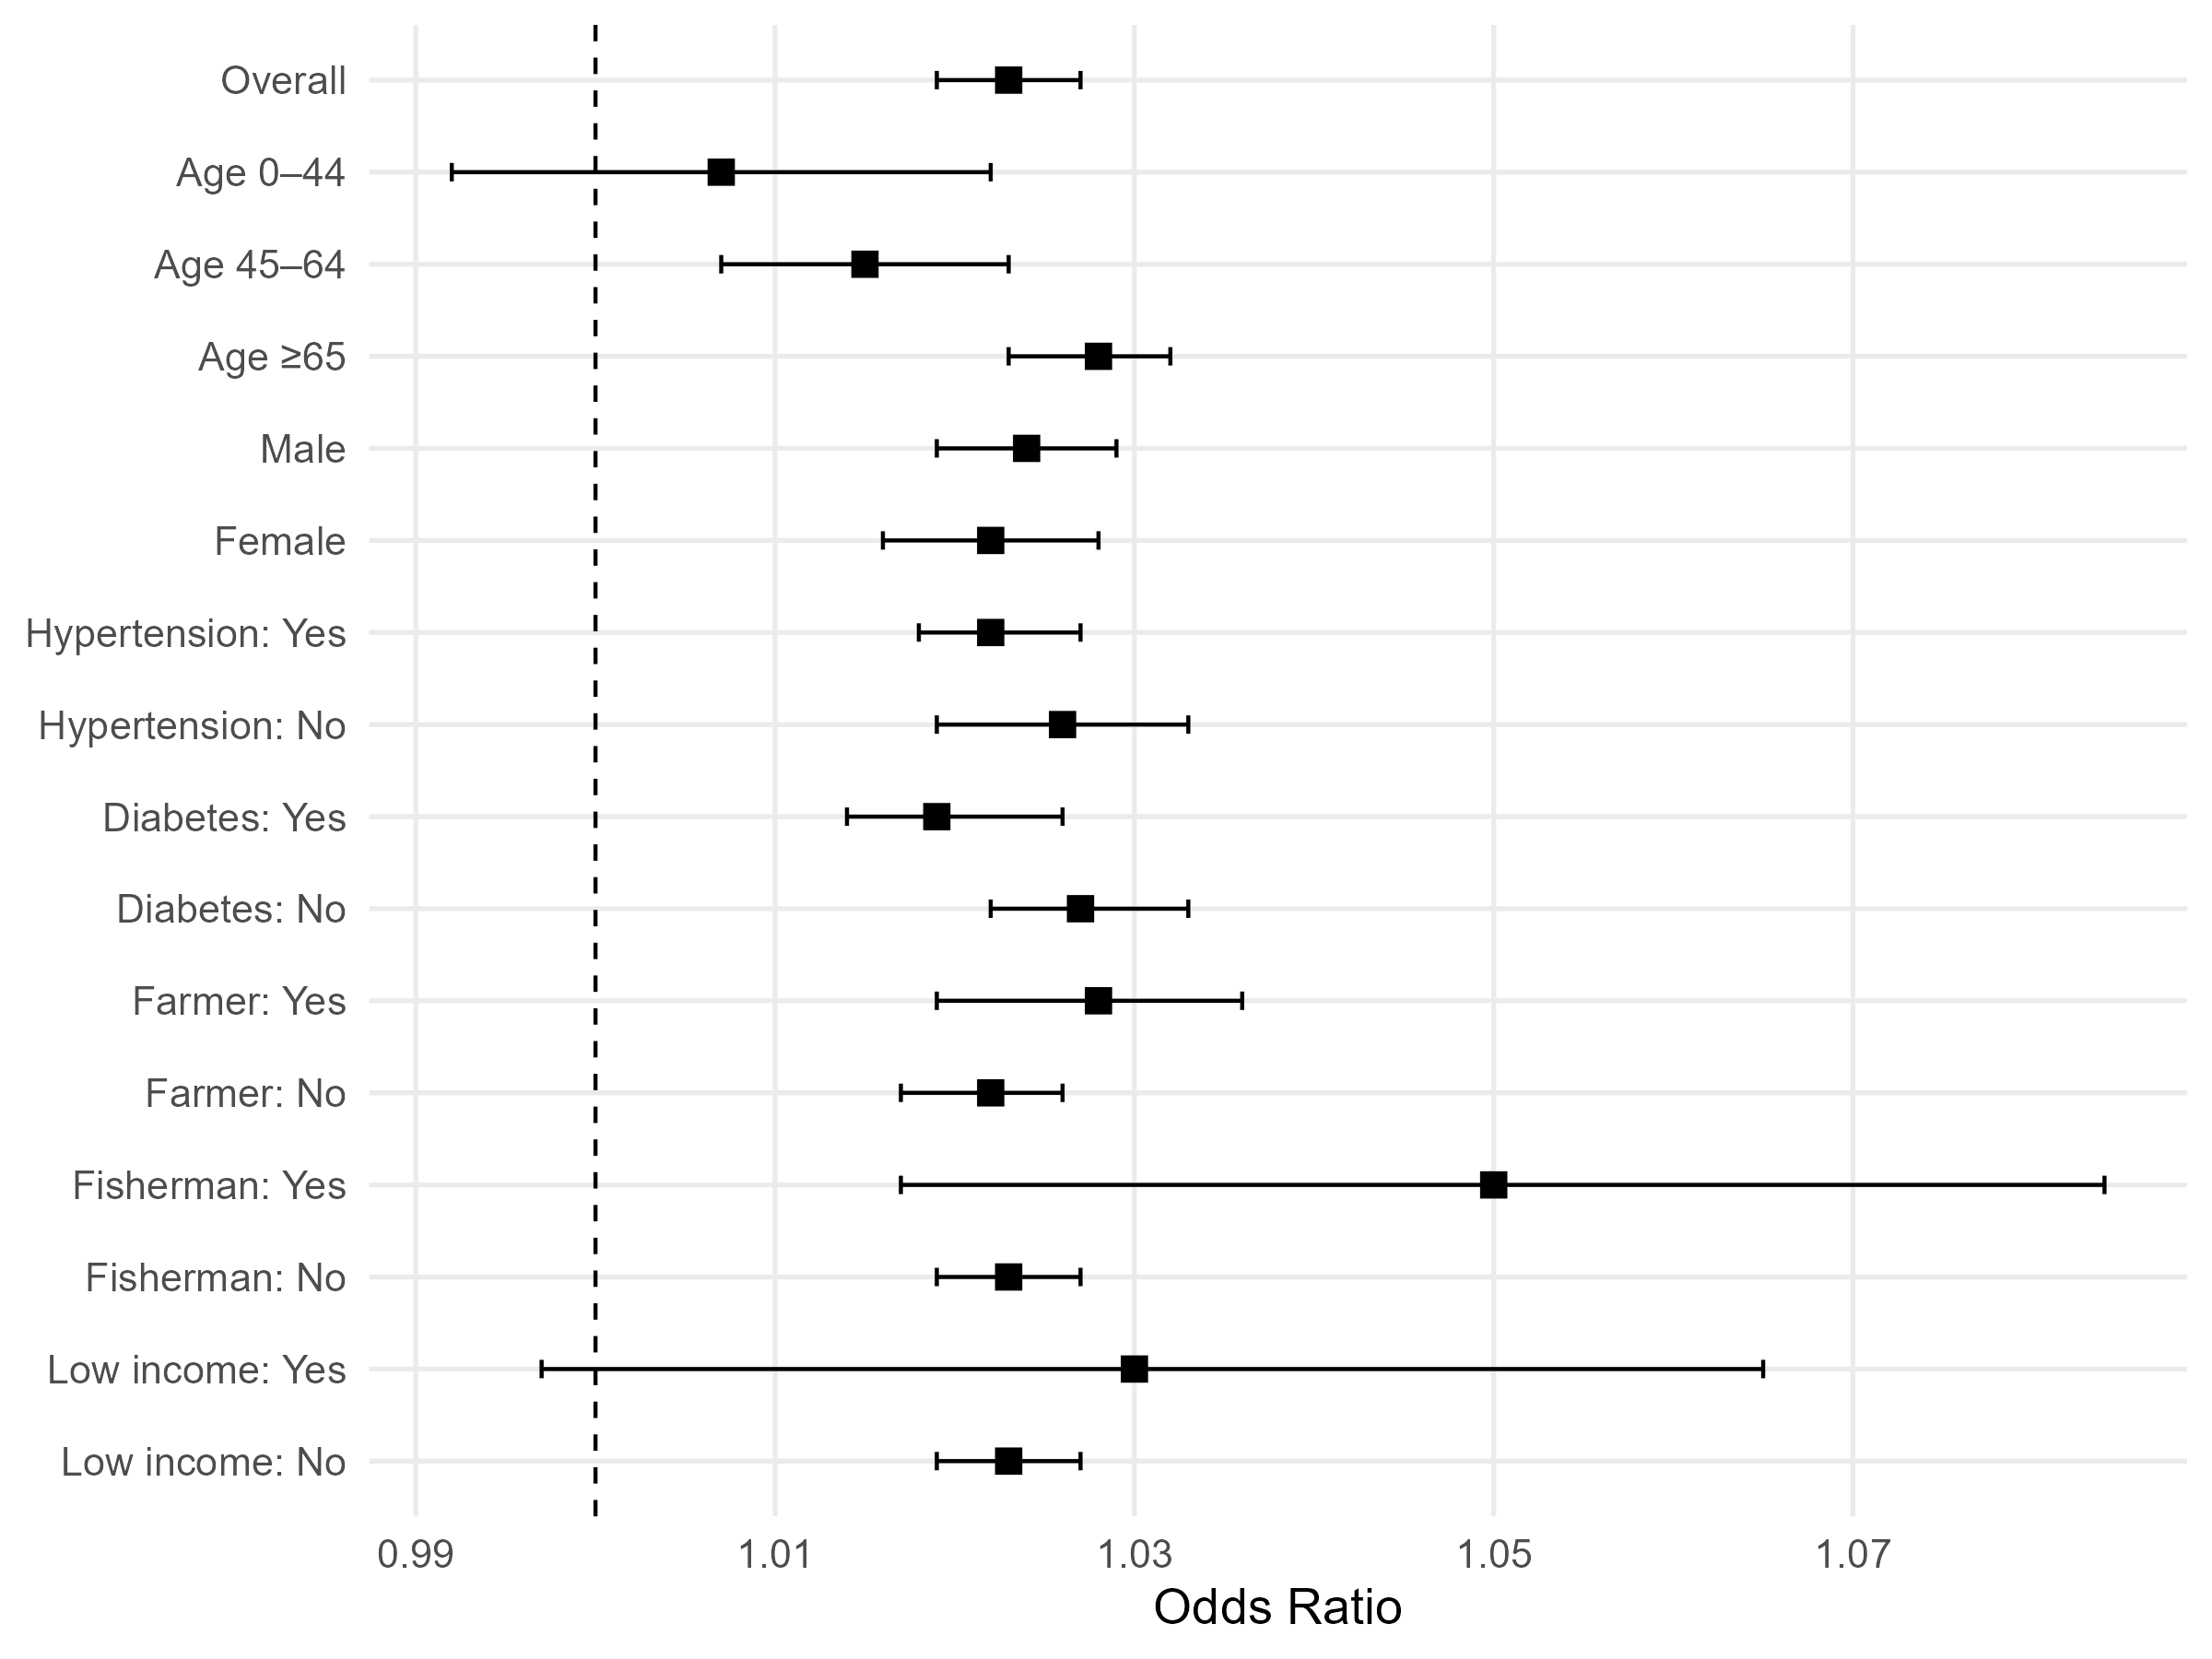


**Figure S4.** ORs of AKI hospitalization per 1°C increase in daily mean temperature above 10°C, stratified by age group, sex, hypertension, diabetes, occupation (farmers, fishermen), and income status (low-income vs. non-low-income).

**Table S6.** ORs for 1°C increments in mean and maximum temperature above the 90th temperature on acute kidney injury hospitalizations, stratified by study areas (2008–2019).

|  | Mean temperature | | | | Maximum temperature | | |
| --- | --- | --- | --- | --- | --- | --- | --- |
|  | *OR* a | *Lower CI* | *Upper CI* | *OR a* | | *Lower CI* | *Upper CI* |
| Overall | 1.187 | 1.138 | 1.240 | 1.152 | | 1.112 | 1.194 |
| Study areas |  |  |  |  | |  |  |
| Yilan County | 1.033 | 0.809 | 1.317 | 1.023 | | 0.858 | 1.218 |
| Hualien County | 1.587 | 1.205 | 2.088 | 1.473 | | 1.191 | 1.823 |
| Nantou County | 1.238 | 0.970 | 1.581 | 1.102 | | 0.850 | 1.430 |
| Pingtung County | 1.184 | 0.951 | 1.474 | 1.154 | | 0.923 | 1.444 |
| Miaoli County | 1.345 | 0.920 | 1.968 | 1.283 | | 0.958 | 1.719 |
| Taoyuan City | 1.156 | 1.007 | 1.329 | 1.106 | | 0.996 | 1.228 |
| Kaohsiung City | 1.207 | 1.057 | 1.378 | 1.221 | | 1.076 | 1.386 |
| Keelung City | 1.201 | 0.947 | 1.526 | 1.123 | | 0.970 | 1.301 |
| Yunlin County | 1.059 | 0.783 | 1.433 | 1.165 | | 0.935 | 1.452 |
| New Taipei City | 1.322 | 1.153 | 1.516 | 1.238 | | 1.098 | 1.395 |
| Hsinchu City | 1.096 | 0.808 | 1.487 | 0.997 | | 0.808 | 1.230 |
| Hsinchu County | 1.385 | 0.877 | 2.189 | 1.150 | | 0.852 | 1.551 |
| Chiayi City | 1.429 | 1.139 | 1.794 | 1.220 | | 1.031 | 1.444 |
| Chiayi County | 0.924 | 0.705 | 1.211 | 0.990 | | 0.780 | 1.256 |
| Changhua County | 1.317 | 1.095 | 1.585 | 1.217 | | 1.045 | 1.417 |
| Taichung City | 1.196 | 1.035 | 1.384 | 1.218 | | 1.053 | 1.408 |
| Taipei City | 1.085 | 0.990 | 1.190 | 1.091 | | 1.012 | 1.178 |
| Taitung County | 1.246 | 0.847 | 1.835 | 1.201 | | 0.947 | 1.523 |
| Tainan City | 1.182 | 0.992 | 1.409 | 1.200 | | 1.021 | 1.410 |

a Adjusted for PM2.5, O3, NO2, and relative humidity.
